# Supplementary material for: Cancer therapeutic targeting using mutant–p53-specific siRNAs
Source: PubMed Central journal article supplement (PMC6756012; doi:10.1038/s41388-018-0652-y), 2019-01-14
Supplement: 41388_2018_652_MOESM2_ESM.pdf [file 41388_2018_652_MOESM2_ESM.pdf]

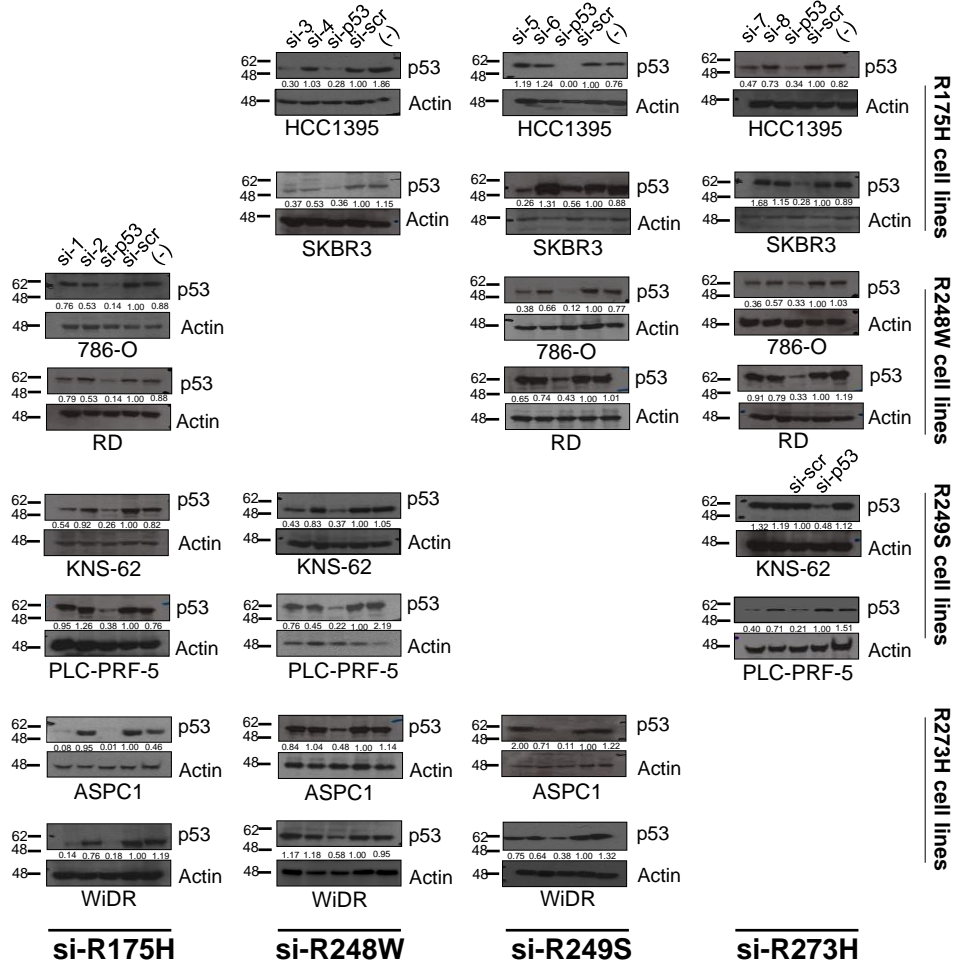

Supplementary Figure 1 Ubbly et al.

HCC1395  
(R175H)

si-scr si-p53 si-1 si-2 si-3 si-4 si-5 si-6 si-7 si-8

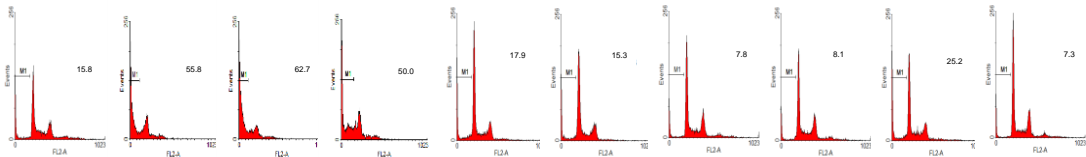

RD  
(R248W)

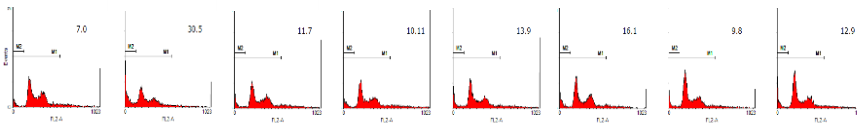

KNS-62  
(R249S)

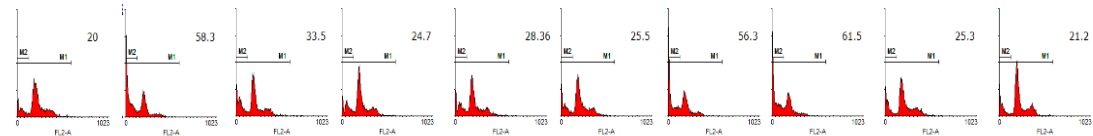

ASPC1  
(R273H)

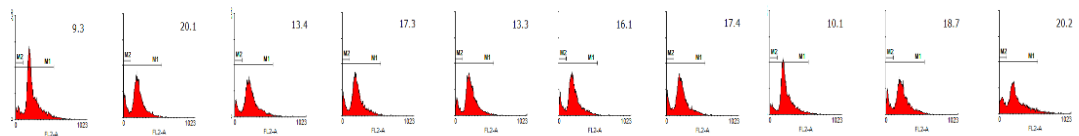

Supplementary Figure 2 Ubyy et al.

### A549 (WT)

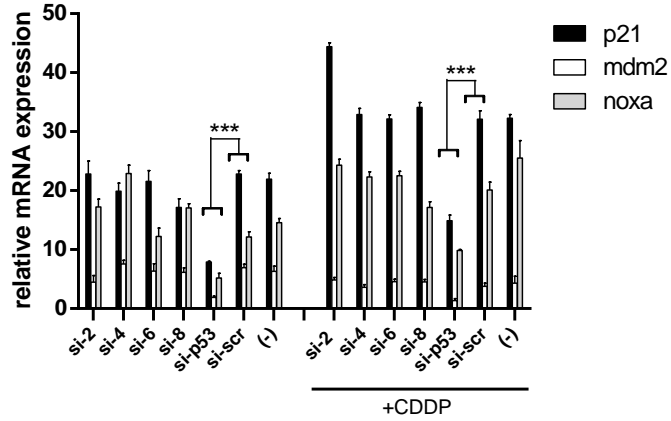

### HCC1395 (R175H)

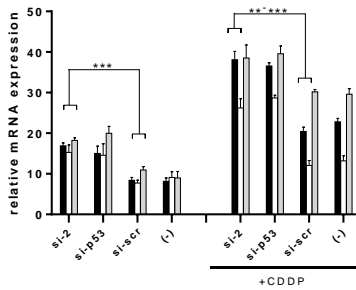

### RD (R248W)

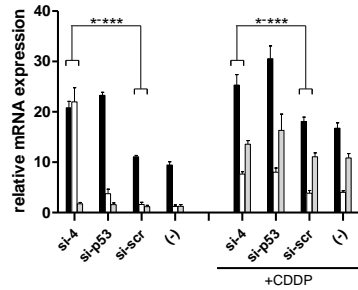

### PLC-PR5 (R249)

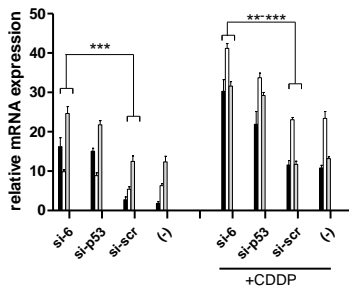

### H1975 (R273H)

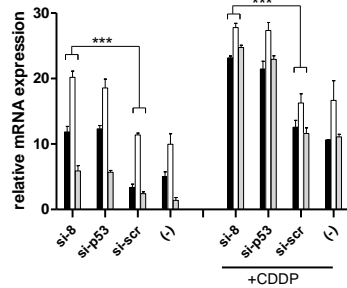

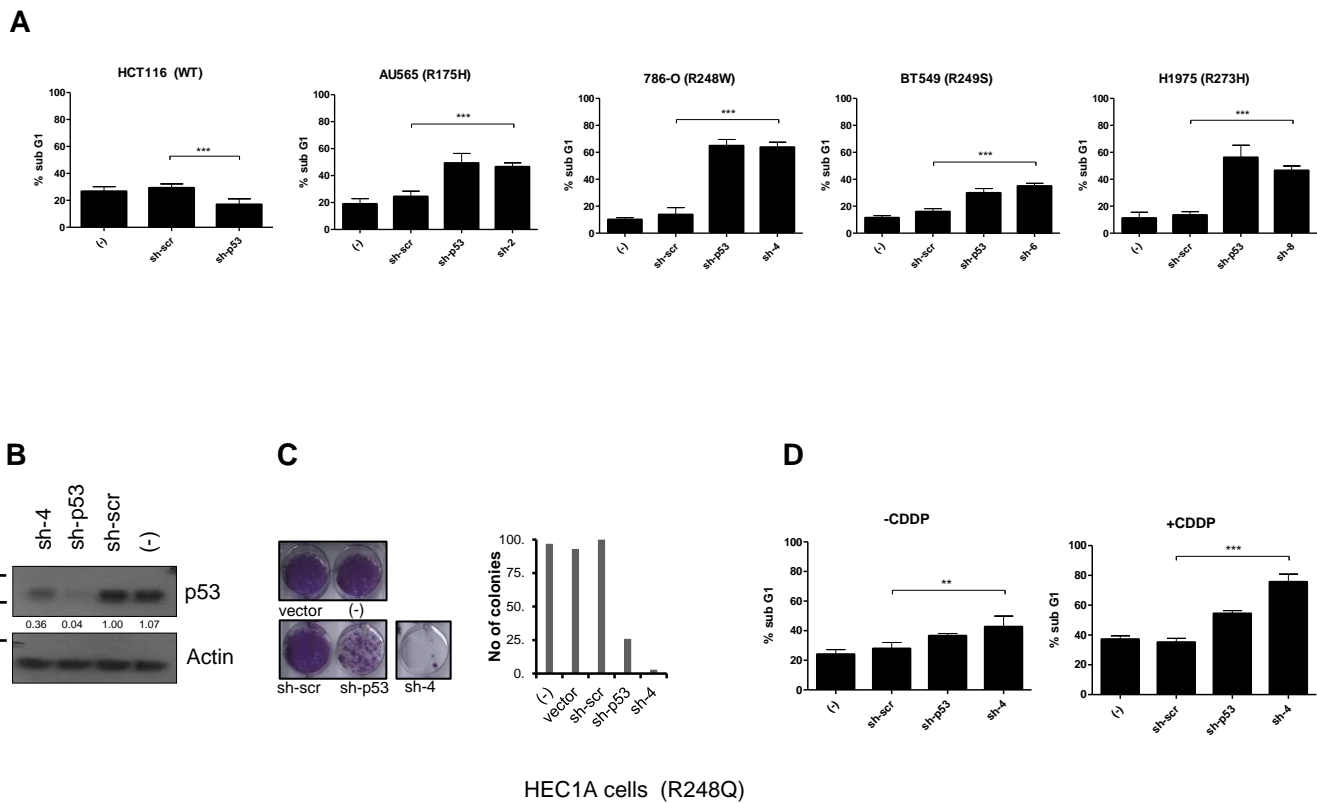

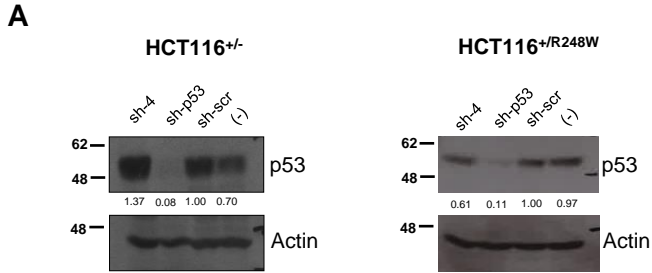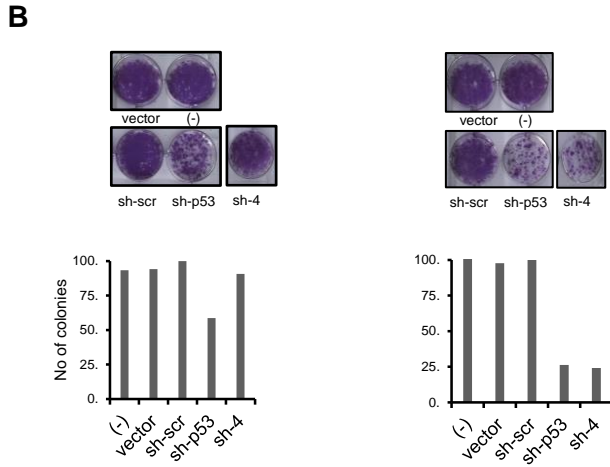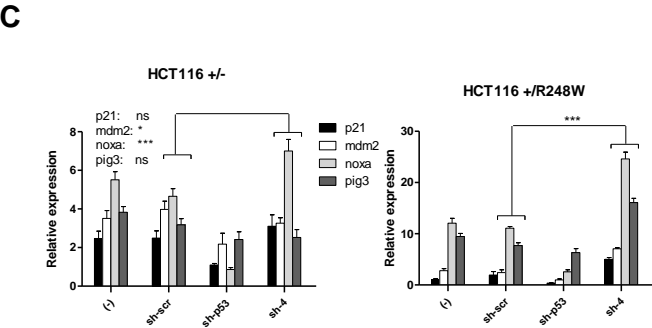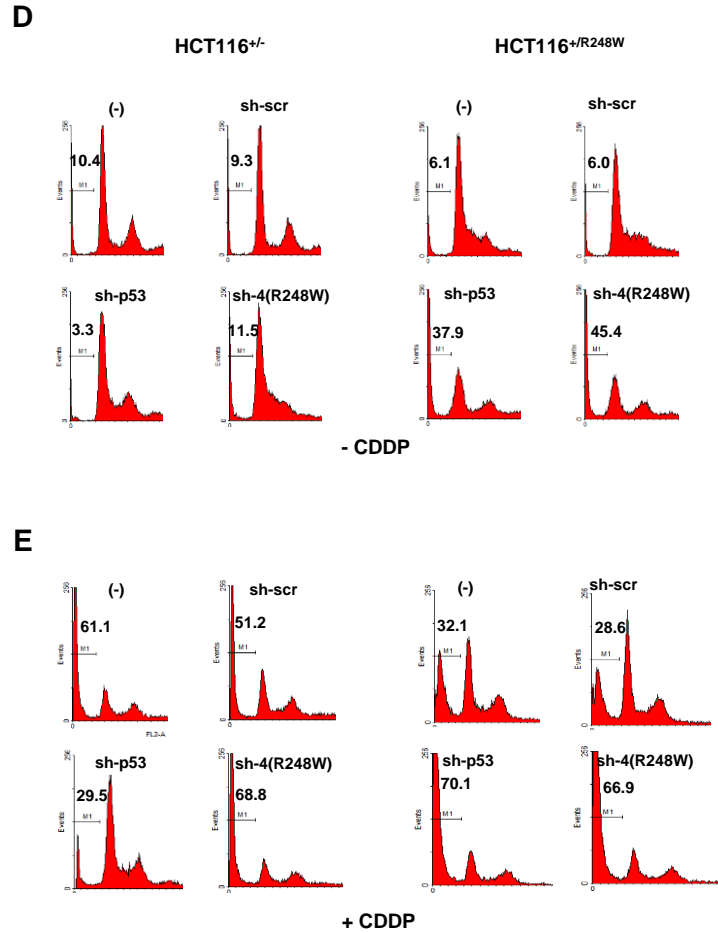

**Supplementary Table 1: Human tumor cell lines used in the study**

| <b>Cell lines used in study</b> | <b>p53 status</b> | <b>Origin of cell line</b>        |
|---------------------------------|-------------------|-----------------------------------|
| <b>A549</b>                     | <b>Wild-type</b>  | <b>Lung carcinoma</b>             |
| <b>A375</b>                     | <b>Wild-type</b>  | <b>Malignant melanoma</b>         |
| <b>HCT116</b>                   | <b>Wild-type</b>  | <b>Colon carcinoma</b>            |
| <b>RKO</b>                      | <b>Wild-type</b>  | <b>Colon carcinoma</b>            |
| <b>AU565</b>                    | <b>R175H</b>      | <b>Breast carcinoma</b>           |
| <b>SKBR3</b>                    | <b>R175H</b>      | <b>Breast carcinoma</b>           |
| <b>HCC1395</b>                  | <b>R175H</b>      | <b>Breast carcinoma</b>           |
| <b>HEC-1A</b>                   | <b>R248Q</b>      | <b>Endometrial adenocarcinoma</b> |
| <b>RD</b>                       | <b>R248W</b>      | <b>Rhabdomyosarcoma</b>           |
| <b>786-O</b>                    | <b>R248W</b>      | <b>Kidney adenocarcinoma</b>      |
| <b>COLO-320DM</b>               | <b>R248W</b>      | <b>Colon adenocarcinoma</b>       |
| <b>PLC-PRF/5</b>                | <b>R249S</b>      | <b>Hepetocellular carcinoma</b>   |
| <b>KNS-62</b>                   | <b>R249S</b>      | <b>Bronchial squamous cancer</b>  |
| <b>BT549</b>                    | <b>R249S</b>      | <b>Breast carcinoma</b>           |
| <b>ASPC1</b>                    | <b>R273H</b>      | <b>Pancreatic adenocarcinoma</b>  |
| <b>WiDR</b>                     | <b>R273H</b>      | <b>Colon adenocarcinoma</b>       |
| <b>H1975</b>                    | <b>R273H</b>      | <b>Lung carcinoma</b>             |
